# Supplementary material for: GVS-12 attenuates non-alcoholic steatohepatitis by suppressing inflammatory responses via PPARγ/STAT3 signaling pathways
Source: Royal Society of Chemistry journal article supplement (doi:10.1039/c8ra10178g), 2019-01-01
Supplement: c8ra10178g1.pdf [file c8ra10178g1.pdf]

As shown in Figure. 1, rosiglitazone (1  $\mu\text{M}$ ) powerfully stimulated adipocyte differentiation at the concentration of 1  $\mu\text{M}$  by intensive Oil-red O staining of cytoplasmic fat droplets. In the control group, hardly any red cells were visible in the untreated cells. Interestingly, when 3T3-L1 cells were treated with 10  $\mu\text{M}$  of GVS-12, very few cells were stained.

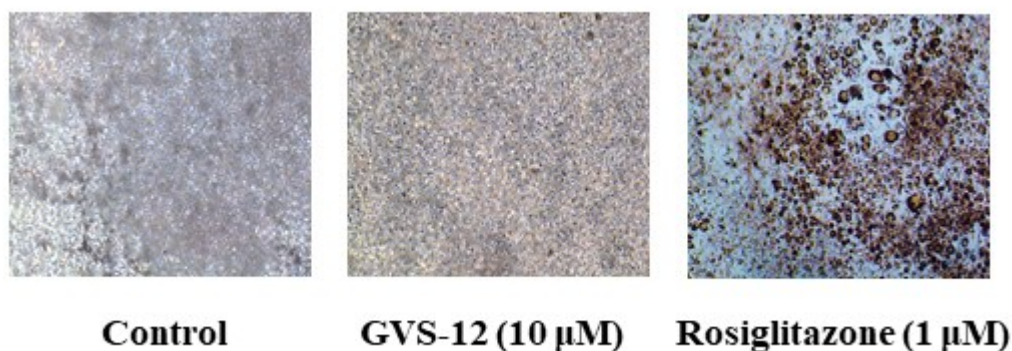

Figure. 1 Lipid accumulation in differentiated 3T3-L1 cells treated with rosiglitazone or GVS-12 by Oil Red O staining. 3T3-L1 fibroblast cells were induced by 1  $\mu\text{M}$  of dexamethasone, 0.5 mM of isobutylmethylxanthine, and 850 nM of insulin for 48 h and cells were switched to maintenance medium containing 850 nM of insulin for 6 days.
